# Supplementary material for: PTCHD1: Identification and Neurodevelopmental Contributions of an Autism Spectrum Disorder and Intellectual Disability Susceptibility Gene
Source: MDPI journal article supplement (doi:10.3390/genes13030527), 2022-03-17
Supplement: s1 [file s1]

## Supplementary Information

**Supplementary Figure S1: RT-qPCR of mouse embryonic brain cDNA at different developmental time-points (E12 to P2) for *Ptchd1* as well as Shh-signalling pathway genes, *Shh*, *Smo*, and *Ptch1*.** Expression is shown as mean fold-change (+/- standard error of the mean), with expression at E12 set at 1.

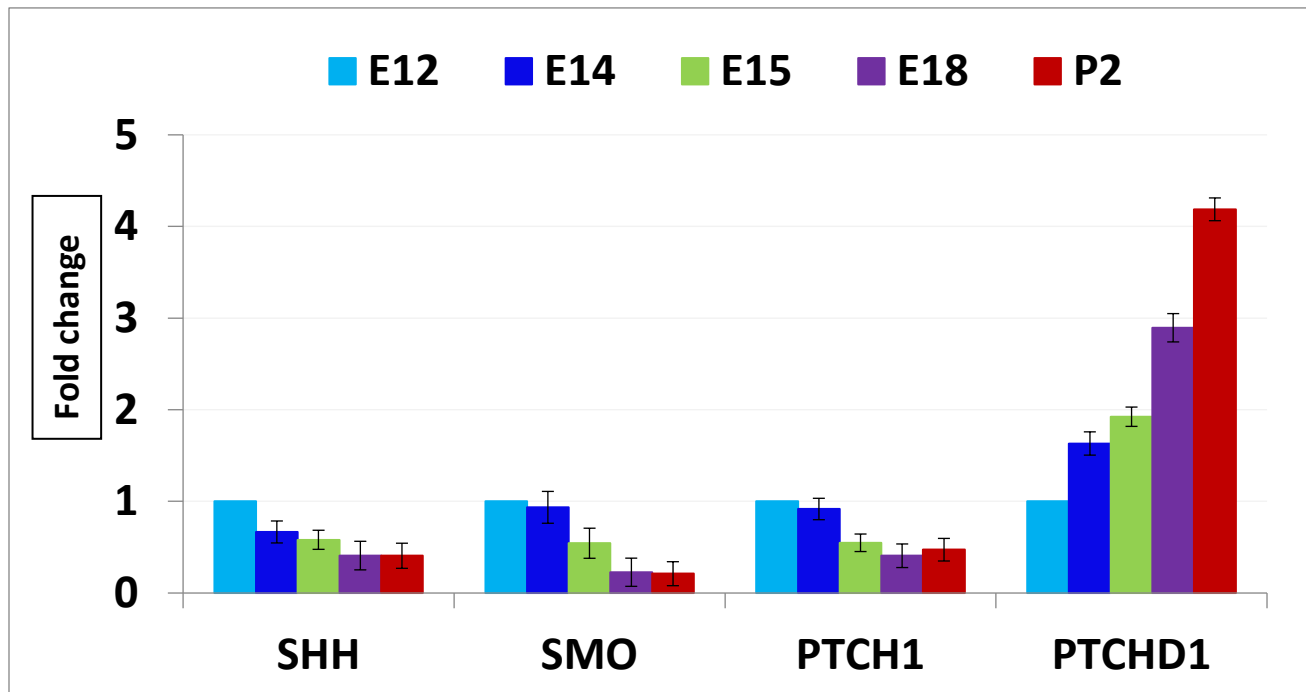

In order to characterize *Ptchd1* expression in WT mice, relative to Shh signaling genes *Ptch1*/*Shh*/*Smo*, offspring from CD-1 mice were used. The mice were mated and checked for sperm plugs. Tissue was collected (N=4 embryos/pups) at gestational days 12, 14, 15, 18 and postnatal day 2. RNA was extracted from whole brains using the Nucleospin RNAII kit (Macherey-Nagel Inc.). RNA concentration and purity were determined using the ratio of 260/280 nm and 260/230 nm, respectively, as determined by a Nanodrop™ 1000 (Thermo Fisher Scientific). Only RNA with a 260/280 nm ratio of >1.90 was used in our analysis. cDNA was synthesized through reverse transcription of 1 µg of RNA using Superscript III™ Reverse Transcriptase (Invitrogen, Carlsbad, CA) and random hexamers according to the manufacturer's guidelines. PCR was performed using 384-well optical plate, using 2 µl of cDNA with a final reaction volume of 16 µl run on a ViiA™7 Real Time PCR System (Life Technologies, Thermo Fisher Scientific). Universal SYBR Green\_ PCR conditions were used (95 °C for 150 s, and 40 cycles at 95 °C for 4 s, and 60 °C for 20 s). For each gene analyzed all samples were run on a single plate to avoid inter-plate variability, and in quadruplicate. Furthermore, each plate contained H<sub>2</sub>O, RT-minus and RNA-minus negative controls. The C<sub>t</sub> for all reactions was

calculated automatically by the Life Technologies ViiA™7 software. Gene expression analysis was calculated using the  $2^{-\Delta\Delta C_t}$  method (Livak and Schmittgen, 2001).

**Primers used:**

Ptchd1 F: ACATCACACGGACCTGATCTTA

Ptchd1 R: CTATGTCATCCACAATGCAAGTC

Smo F: CTTATTGTGGGAGGCTACTTCCT

Smo R: TGGTCTCGTTGATCTTGCTG

Ptch1 F: TGGTTGTGGGTCTCCTCATATT

Ptch1 R: AATTCTCGACTCACTCGTCCAC

Actin F: CGTGCGTGACATCAAAGA

Actin R: TGCCACAGGATTCCATAC

Shh F: GATGACTCAGAGGTGCAAAGAC

Shh R: ACTGCTCGACCCTCATAGTGTA

**References:**

Livak KJ, Schmittgen TD. *Methods*. Vol. 25. San Diego, CA: 2001. Analysis of relative gene expression data using real-time quantitative PCR and the  $2^{-(\Delta\Delta C(T))}$  Method; pp. 402–408
