# Supplementary material for: PTCHD1: Identification and Neurodevelopmental Contributions of an Autism Spectrum Disorder and Intellectual Disability Susceptibility Gene
Source: Genes (Basel). 2022 Mar 17;13(3):527. doi: 10.3390/genes13030527 (PMC8953913; doi:10.3390/genes13030527)
Supplement: Supplementary file 1 [file genes-13-00527-s001.zip › Supplementary Table S1.xlsx]

## Sheet: Supplementary Table 1
							Genome Coordinates (hg38)
	Family/Proband ID	Variant Type	Proband Sex	Inheritance	Segregation with Neurodevel. Phenotype	Size (Kbp)	Start	End	Gene(s) Affected	Behavioural/Cognitive Phenotype	Source(s)
	1-0186-4/5240_4	Deletion CNV	Male	Maternal	+	167	23186141	23353685	PTCHD1-AS, PTCHD1	ASD, ADHD	[5, 11, 12, 15]
	13047_563	Deletion CNV	Male	Maternal	Yes, based on available data	385	22901145	23286674	PTCHD1-AS, DDX53	ASD	[11, 12]
	5111_3	Deletion CNV	Male	Maternal	Not segregating fully	54	22916132	22969676	PTCHD1-AS	ASD, Language Delay
	3253_4	Deletion CNV	Male	Maternal	Not segregating fully	47	22932186	22979416	PTCHD1-AS	ASD
	5065_3	Deletion CNV	Male	Maternal	Yes, based on available data	63	22932186	22995542	PTCHD1-AS	ASD, Language Delay
	5298_3	Deletion CNV	Male	Maternal	+	121	22964342	23085456	PTCHD1-AS, DDX53	ASD, Language Impairment
	3424_3	Deletion CNV	Male	Maternal	+	103	23085212	23188150	PTCHD1-AS	ASD
	GOLD540	Deletion CNV	Male	Maternal	+	90	23310970	23401172	PTCHD1-AS, PTCHD1	Moderate-to-severe ID	[11, 14]
	S01407	Missense (I173V)	Male	Maternal	+	N/A	N/A	N/A	PTCHD1	ASD	[11]
	S01433	Missense (ML336-7II)	Male	Maternal	+	N/A	N/A	N/A	PTCHD1	ASD
	S01355	Missense (E479G)	Male	Maternal	Yes, based on available data	N/A	N/A	N/A	PTCHD1	High-functioning ASD
	AU0501	Missense (L73F)	Male	Maternal	Not segregating fully	N/A	N/A	N/A	PTCHD1	ASD
	GOLD243	Missense (A470D)	Male	Maternal	Yes, based on available data	N/A	N/A	N/A	PTCHD1	Mild ID
	GOLD398	Missense (H359R)	Male	Maternal	Yes, based on available data	N/A	N/A	N/A	PTCHD1	Severe ID, Seizures
	1-0215	Missense (I173V)	Male	Maternal	+	N/A	N/A	N/A	PTCHD1	ASD, ID, Hyperactive
	3-0002	Missense (V195I)	Male	Maternal	+	N/A	N/A	N/A	PTCHD1	ASD, Severe Language Delay
	5298	Deletion CNV	Male	Maternal	+	125	22962377	23087629	PTCHD1-AS, DDX53	ASD, ID, Speech Delay
	5065	Deletion CNV	Male	Maternal	Not segregating fully	65	22931256	22996098	PTCHD1-AS	ASD
	3424	Deletion CNV	Male	Maternal	+	105	23083681	23188174	PTCHD1-AS	ASD
	5111	Deletion CNV	Male	Maternal	Not segregating fully	59	22913496	22972452	PTCHD1-AS	ASD
	3253	Deletion CNV	Male	Maternal	Not segregating fully	54	22925939	22980307	PTCHD1-AS	ASD
	13047	Deletion CNV	Male	Maternal	Not segregating fully	389	22898439	23286994	PTCHD1-AS	ASD
	8273	Deletion CNV	Male	Maternal	Not segregating fully	102	23061294	23163042	PTCHD1-AS	ASD, but didn't inherit deletion
	8013	Deletion CNV	Male	Maternal	Not segregating fully	65	22931256	22996098	PTCHD1-AS	ASD, but didn't inherit deletion
	3387	Deletion CNV	Male	Paternal	Not segregating fully	213	22896458	23109470	PTCHD1-AS	ASD, but didn't inherit deletion
	1-27075	Deletion CNV	Male	Maternal	+	388	22750776	23138781	PTCHD1-AS	BAP, ADHD, NVLD
	B	Deletion CNV	Male	Maternal	+	197	23255106	23452387	PTCHD1-AS, PTCHD1	ASD, DD, Severe ID	[6, 7]
	A	Truncating (L482Yfs*14)	Male	Maternal	Data not available	N/A	N/A	N/A	PTCHD1	ASD, DD, ID	[6]
	C	Deletion CNV	Male	Maternal	Data not available	801	22543121	23344359	PTCHD1-AS, DDX53, PTCHD1	DD, Mild ID, ASD Features
	D	Deletion CNV	Male	Maternal	Data not available	146	23218889	23365235	PTCHD1-AS, PTCHD1	Moderate DD
	E	Deletion CNV	Male	Maternal	Data not available	300	23092817	23393046	PTCHD1-AS, PTCHD1	Mild DD
	F	Deletion CNV	Male	Maternal	Data not available	90	23310970	23401172	PTCHD1	DD, Mild-to-moderate ID
	G	Deletion CNV	Male	Maternal	Data not available	167	23186141	23353685	PTCHD1-AS, PTCHD1	ASD, DD, Dyslexia, LD
	H	Deletion CNV	Male	Maternal	Data not available	503	22942626	23445220	PTCHD1-AS, DDX53, PTCHD1	DD
	I	Deletion CNV	Male	Maternal	Data not available	273	23313067	23586129	PTCHD1	Isolated Motor Delay
	J	Deletion CNV	Male	de novo		412	23146305	23558115	PTCHD1-AS, PTCHD1	DD, ASD Features
	K	Deletion CNV	Female	Maternal	Data not available	643	22668654	23336538	PTCHD1-AS, DDX53, PTCHD1	ASD, Isolated Speech Delay
	L	Deletion CNV	Male	Maternal	Data not available	329	23178211	23507226	PTCHD1-AS, PTCHD1	ASD, DD, Mild ID
	M	Deletion CNV	Male	Maternal	Data not available	963	22377522	23340296	PTCHD1-AS, DDX53, PTCHD1	ASD, Speech Delay
	N	Deletion CNV	Male	Maternal	Data not available	46	23346806	23393017	PTCHD1	ADHD, DD, LD
	O	Truncating (N599Kfs*8)	Male	Maternal	Data not available	N/A	N/A	N/A	PTCHD1	DD, ID
	P	Truncating (L482Yfs*14)	Male	de novo		N/A	N/A	N/A	PTCHD1	DD
	N/A	Missense (S51N)	Male	Data not available	Data not available	N/A	N/A	N/A	PTCHD1	ID	[19]
	N/A	Missense (K181T)	Male	Data not available	Data not available	N/A	N/A	N/A	PTCHD1	Seizures	[17]
	Patient 1	Deletion CNV	Male	Maternal	Data not available	95	23251335	23346803	PTCHD1-AS, PTCHD1	ASD, DD, ID, ADHD	[9]
	Patient 2	Deletion CNV	Male	Data not available	Data not available	92	23377596	23469276	PTCHD1	DD, ID
	Patient 3	Deletion CNV	Male	Data not available	Data not available	220	23122620	23342353	PTCHD1-AS, PTCHD1	DD, ID, ADHD, ASD Features
	1-0779-003	Deletion CNV	Male	Data not available	Data not available	1169	22642857	23811962	PTCHD1-AS, DDX53, PTCHD1, PRDX4, SAT1	ASD	[15]
	157175	Deletion CNV	Male	Maternal	Data not available	202	23252419	23454704	PTCHD1-AS, PTCHD1	Schizophrenia
	12-8257-001	Deletion CNV	Male	Maternal	Data not available	90	23025759	23116119	PTCHD1-AS	ASD
	POD_0073	Missense (L415F)	Male	Data not available	Data not available	N/A	N/A	N/A	PTCHD1	DD, Epilepsy	[18]
	PK68	Deletion CNV	Male	Paternal	Not segregating fully	194	22900750	23095151	PTCHD1-AS, DDX53	ID	[10]
	8257	Deletion CNV	Male	Maternal	Data not available	84	23027437	23111923	PTCHD1	ASD	[13]
	N/A	Missense (P32L)	Male	Maternal	Data not available	N/A	N/A	N/A	PTCHD1	DD	[16]
	N/A	Missense (P32R)	Male	Maternal	Data not available	N/A	N/A	N/A	PTCHD1	ID, ASD
	N/A	Missense (Y213C)	Male	Maternal	Data not available	N/A	N/A	N/A	PTCHD1	DD
	N/A	Missense (G300R)	Male	Maternal	Data not available	N/A	N/A	N/A	PTCHD1	DD
	N/A	Missense (A310P)	Male	Maternal	Data not available	N/A	N/A	N/A	PTCHD1	DD
	DECIPHER-259242	Nonsense (R691*)	Male	de novo		N/A	N/A	N/A	PTCHD1	DD	[8]
	DECIPHER-262820	Missense (D527E)	Male	Maternal	Data not available	N/A	N/A	N/A	PTCHD1	ASD
	DECIPHER-292680	Missense (H24N)	Male	Data not available		N/A	N/A	N/A	PTCHD1	DD, Aggressiveness, Attention deficits
	DECIPHER-318071	Truncating (I564Rfs*6)	Male	Data not available		N/A	N/A	N/A	PTCHD1	ID
	DECIPHER-248781	Deletion CNV	Male	Data not available		575	22818207	23393046	PTCHD1-AS, DDX53, PTCHD1	Data not available
	DECIPHER-275039	Deletion CNV	Male	Data not available		229	23217178	23445718	PTCHD1-AS, PTCHD1	Speech delay
	DECIPHER-322903	Deletion CNV	Male	de novo		437	23075012	23511918	PTCHD1-AS, PTCHD1	ASD
	DECIPHER-291517	Deletion CNV	Male	Data not available		488	23146305	23634173	PTCHD1-AS, PTCHD1	ASD, DD
	DECIPHER-269115	Deletion CNV	Male	Data not available		104	23251135	23355161	PTCHD1-AS, PTCHD1	ID, Seizures, Stereotypy
	DECIPHER-333330	Deletion CNV	Female	Maternal	Data not available	176	23269033	23445219	PTCHD1-AS, PTCHD1	ASD, Moderate ID
	DECIPHER-339831	Deletion CNV	Male	Data not available		109	23283565	23393046	PTCHD1-AS, PTCHD1	ID
	DECIPHER-267889	Deletion CNV	Male	Data not available		273	23313067	23586129	PTCHD1	Data not available
	DECIPHER-275156	Deletion CNV	Male	Data not available		157	23354961	23511918	PTCHD1	Data not available
	DECIPHER-355306	Deletion CNV	Male	Data not available		119	23392987	23511918	PTCHD1	ID
	DECIPHER-304632	Deletion CNV	Data not available	Maternal	Data not available	121	23393017	23514202	PTCHD1	Aggressiveness, Stereotypy
	nssv582942 (nsv3895955)	Deletion CNV	Data not available			313	23052089	23365234	PTCHD1-AS, PTCHD1	Data not available	[21]
	nssv583742 (nsv3909589)	Duplication CNV	Data not available			212	23251335	23463809	PTCHD1-AS, PTCHD1	Data not available
	nssv13647931 (nsv3881037)	Deletion CNV	Data not available			54	23322700	23376953	PTCHD1	Data not available
	nssv13646573 (nsv3875328)	Deletion CNV	Data not available			98	23333253	23431718	PTCHD1	Data not available
	nssv13643064 (nsv3876795)	Deletion CNV	Data not available	Maternal	Data not available	72	23357590	23429967	PTCHD1	Data not available
	nssv14082399 (nsv3875888)	Deletion CNV	Data not available	Maternal	Data not available	62	23367640	23429967	PTCHD1	Data not available
	ClinVar-564801	Duplication CNV	Data not available			211	23340439	23551395	PTCHD1	Data not available	[20]

## Sheet: References
Reference Number	Author	Year
5	Marshall	2008	Marshall, C.R.; et al. Structural variation of chromosomes in autism spectrum disorder. Am. J. Hum. Genet. 2008, 82, 477–488. https://doi.org/10.1016/j.ajhg.2007.12.009
6	Chaudhry	2015	Chaudhry, A.; et al. Phenotypic spectrum associated with PTCHD1 deletions and truncating mutations includes intellectual disability and autism spectrum disorder. Clin. Genet. 2015, 88, 224–233. https://doi.org/10.1111/cge.12482
7	Filges	2011	Filges, I.; et al. Deletion in Xp22.11: PTCHD1 is a candidate gene for X-linked intellectual disability with or without autism. Clin. Genet. 2011, 79, 79–85. https://doi.org/10.1111/j.1399-0004.2010.01590.x.
8	Firth	2009	Firth, H.V.; et al. DECIPHER: Database of Chromosomal Imbalance and Phenotype in Humans Using Ensembl Resources. Am. J. Hum. Genet. 2009, 84, 524–533. https://doi.org/10.1016/j.ajhg.2009.03.010.
9	Gambin	2017	Gambin, T.; et al. Identification of novel candidate disease genes from de novo exonic copy number variants. Genome. Med. 2017, 9, 83. https://doi.org/10.1186/s13073-017-0472-7.
10	Harripaul	2018	Harripaul, R.; et al. Mapping autosomal recessive intellectual disability: Combined microarray and exome sequencing identifies 26 novel candidate genes in 192 consanguineous families. Mol. Psychiatry 2018, 23, 973–984. https://doi.org/10.1038/mp.2017.60.
11	Noor	2010	Noor, A.; et al. Disruption at the PTCHD1 Locus on Xp22.11 in Autism spectrum disorder and intellectual disability. Sci. Transl. Med. 2010, 2, 49ra68. https://doi.org/10.1126/scitranslmed.3001267.
12	Pinto	2010	Pinto, D.; et al. Functional impact of global rare copy number variation in autism spectrum disorders. Nature 2010, 466, 368–372. https://doi.org/10.1038/nature09146.
13	Roy	2021	Roy, D.S.; et al. Anterior thalamic dysfunction underlies cognitive deficits in a subset of neuropsychiatric disease models. Neuron 2021, 109, 2590–2603.e13. https://doi.org/10.1016/j.neuron.2021.06.005.
14	Whibley	2010	Whibley, A.C.; et al. Fine-scale survey of X chromosome copy number variants and indels underlying intellectual disability. Am. J. Hum. Genet. 2010, 87, 173–188. https://doi.org/10.1016/j.ajhg.2010.06.017.
15	Zarrei	2019	Zarrei, M.; et al. A large data resource of genomic copy number variation across neurodevelopmental disorders. NPJ Genom. Med. 2019, 4, 26. https://doi.org/10.1038/s41525-019-0098-3.
16	Halewa	2021	Halewa, J.; et al. Novel missense mutations in PTCHD1 alter its plasma membrane subcellular localization and cause intellectual disability and autism spectrum disorder. Hum. Mutat. 2021, 42, 848–861. https://doi.org/10.1002/humu.24208.
17	Karaca	2015	Karaca, E.; et al. Genes that Affect Brain Structure and Function Identified by Rare Variant Analyses of Mendelian Neurologic Disease. Neuron 2015, 88, 499–513. https://doi.org/10.1016/j.neuron.2015.09.048.
18	Rochtus	2020	Rochtus, A.; et al. Genetic diagnoses in epilepsy: The impact of dynamic exome analysis in a pediatric cohort. Epilepsia 2020, 61, 249–258. https://doi.org/10.1111/epi.16427.
19	Torrico	2015	Torrico, B.; et al. Contribution of common and rare variants of the PTCHD1 gene to autism spectrum disorders and intellectual disability. Eur. J. Hum. Genet. 2015, 23, 1694–1701. https://doi.org/10.1038/ejhg.2015.37.
20	Landrum	2018	Landrum, M.J.; et al. ClinVar: Improving access to variant interpretations and supporting evidence. Nucleic. Acids. Res. 2018, 46, D1062–D1067. https://doi.org/10.1093/nar/gkx1153.
21	Lappalainen	2013	Lappalainen, I.; et al. DbVar and DGVa: Public archives for genomic structural variation. Nucleic. Acids. Res. 2013, 41, D936–D941. https://doi.org/10.1093/nar/gks1213.

## Sheet: Summary
		PTCHD1	PTCHD1-AS	Both	Total	Not Segregating	Reference(s)
	Deletion CNV	0	6	0	6	2	7, 9
		0	0	1	1	0	8, 9
		0	10	0	10	7	9
		0	0	1	1	0	10, 11
		0	1	0	1	1	Harripaul, 2018
		0	17	2	19	10
						0.526316		None of the 10 that didn't segregate encompassed PTCHD1
		PTCHD1	PTCHD1-AS	Both	Total	Reference(s)
	Deletion CNV	3	0	9	12	11		1 de novo male proband, 1 female proband
		1	0	2	3	14
		0	1	2	3	15
		1	0	0	1	18
		2	0	6	8	20		1 de novo male proband; 1 female proband
		7	1	19	27
		PTCHD1	Not Segregating	Total	Reference(s)
	Missense	8	1	8	9
			0.875
		PTCHD1	Total	Reference(s)
	Missense	1	1	12
		1	1	13
		1	1	17
		5	5	19
		2	2	20
	Truncating	3	3	11		1 de novo proband
		1	1	20
	Nonsense	1	1	20
			15
		Total	69
		Deletion	46	44 inherited, 2 de novo
		SNV	23
		Missense	18
		Truncating	4	3 inherited, 1 de novo
		Nonsense	1
